# Supplementary material for: Metodologia d'història de la premsa a Mallorca: les publicacions nacionalistes
Source: PLOS journal article supplement (doi:10.1371/journal.pcbi.1006167), 1989-01-01
Supplement: S10 (10.1371/journal.pcbi.1006167.s010) [file journal.pcbi.1006167.s010]

## Supporting Table

**TableS4: Summary results for the GLMM for the relation between eggs in the utero and parasite body length (Fig S2).** The number of eggs per female worm is modeled as a function of worm length (mm) and experimental phase (pre- and post-) with a random effect the rabbit from which worms were sampled. We used a log-link function and Poisson error distribution.

|             | Estimate  | Standard-error | z-value | p-value           |
|-------------|-----------|----------------|---------|-------------------|
| (intercept) | -0.003668 | 0.131071       | -0.03   | 0.978             |
| length      | 0.302004  | 0.009317       | 32.41   | $< 2e - 16^{***}$ |
| phase       | -0.141123 | 0.150537       | -0.94   | 0.349             |
